# Supplementary material for: Sympathetic motor neuron dysfunction is a missing link in age-associated sympathetic overactivity
Source: eLife journal article supplement (doi:10.7554/elife.91663), 2023-11-02

**Figure Source Data 1.** Original membranes corresponding to Figure 6 panel F.

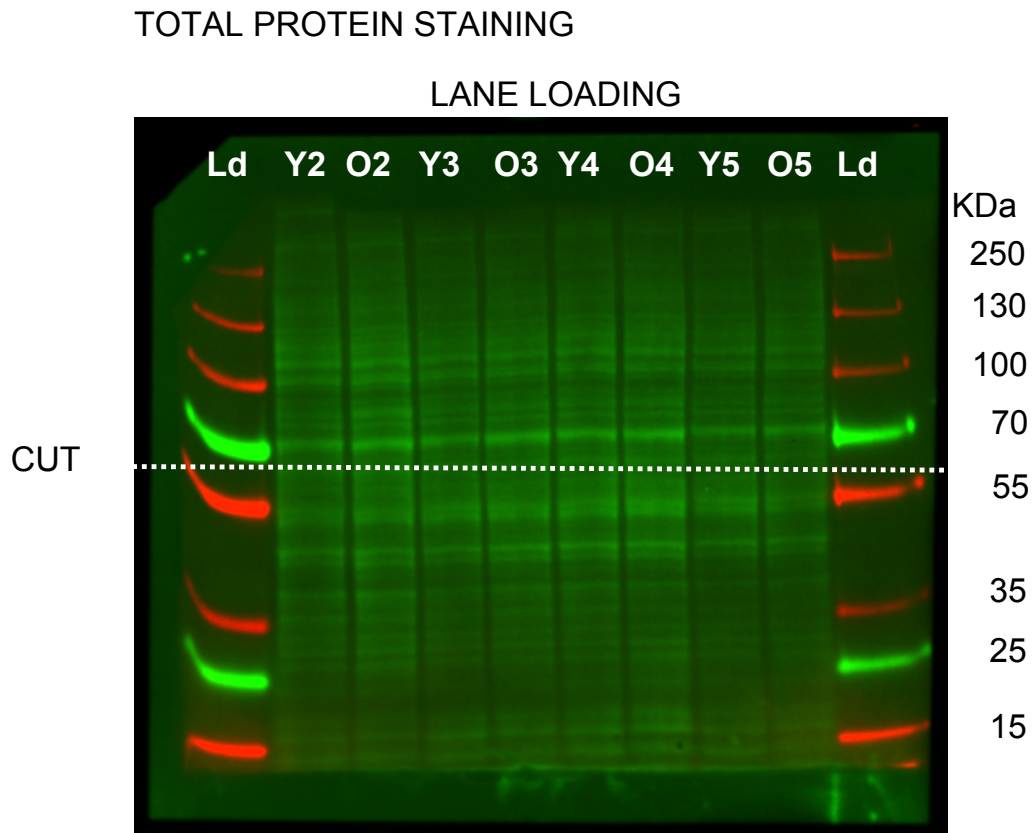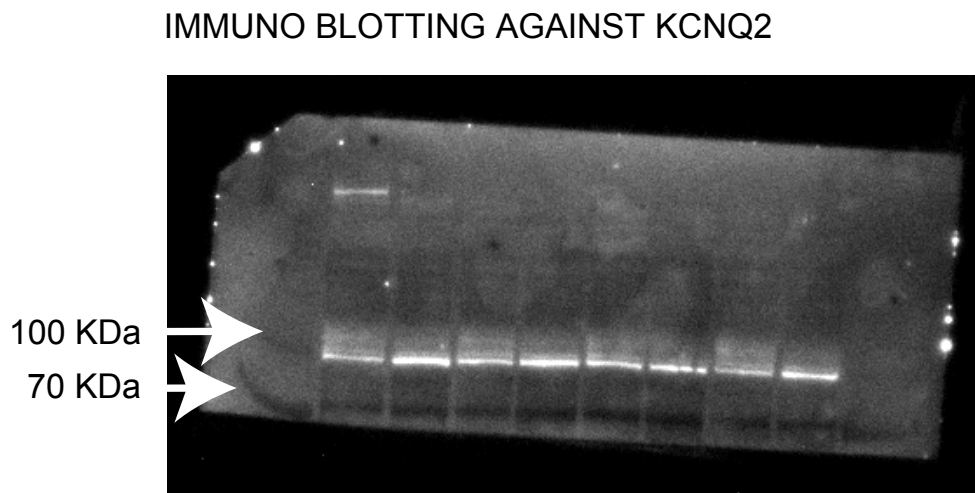

Supplement: fig6-data1 [file elife-91663-fig6-data1-v1.pdf]
